Development 133, 4608 (2006) doi:10.1242/dev.02691

***Arabidopsis* SPA proteins regulate photoperiodic flowering and interact with the floral inducer CONSTANS to regulate its stability**

**Sascha Laubinger, Virginie Marchal, José Le Gourriec, Stephan Wenkel, Jessika Adrian, Seonghoe Jang, Carmen Kulajta, Helen Braun, George Coupland and Ute Hoecker**

There was an error published in *Development* **133**, 3213-3222.

The name of author José Le Gourriec was incorrectly listed as José Gentilhomme.

The authors apologise to readers for this mistake.
